# Supplementary material for: Computational Analysis of mRNA Expression Profiles Identifies the ITG Family and PIK3R3 as Crucial Genes for Regulating Triple Negative Breast Cancer Cell Migration
Source: Biomed Res Int. 2014 May 6;2014:536591. doi: 10.1155/2014/536591 (PMC4032728; doi:10.1155/2014/536591)
Supplement: Supplementary file 1 — Supplement 1. KEGG pathway analysis indicated that PIK3R3, ITGB1, ITGA6, and ITGAL were involved in actin cytoskeleton pathway. Supplement 2. miR upstream regulators were identified by IPA analysis. [file 536591.f1.zip]

Archive with 2 entries (2 files):
- 536591.f1/882850.ppt
- 536591.f1/882851.ppt
